1 **Title: Understanding the dynamics of laboratory populations of *Drosophila melanogaster*:**

2 **Long-term experiments meet individual-based modelling**

3

4 **Authors:** Sudipta Tung<sup>a</sup>, M. Rajamani<sup>b,c</sup>, Amitabh Joshi<sup>b</sup> and Sutirth Dey<sup>a\*</sup>

5 **Affiliations:**

6 <sup>a</sup>Population Biology Laboratory, Biology Division, Indian Institute of Science Education and  
7 Research-Pune, Dr. Homi Bhabha Road, Pune, India, 411 008

8

9 <sup>b</sup>Evolutionary Biology Laboratory, Evolutionary and Organismal Biology Unit, Jawaharlal  
10 Nehru Centre for Advanced Scientific Research, Jakkur P.O., Bengaluru, India, 560 064

11 <sup>c</sup>Present Address: Clintus Network Ltd., No. 205/1 & 2, PCR Warehouse Complex, Soukya  
12 Road, Koralur Village, Hoskote, Bengaluru 562 114

13

14

15 **\*Name and address of the corresponding author:**

16 Sutirth Dey

17 Associate Professor, Biology Division

18 Indian Institute of Science Education and Research (IISER) Pune

19 Dr. Homi Bhabha Road, Pune, India 411 008

20 Tel: [+91-20-25908054](tel:+91-20-25908054)

21 Email: [s.dey@iiserpune.ac.in](mailto:s.dey@iiserpune.ac.in)

22

23 **Running head:** Modeling *Drosophila* population dynamics

24

25 **Key words:** fluctuation index; stability; constancy; population dynamics; minimum critical

26 **size; time-series; stage-structured model.**

27 **ABSTRACT**

28 The effect of differential resource availability at different life-stages on population dynamics  
29 remains relatively unexplored for stage-structured populations. Here, we present analyses of  
30 census data from a 49-generation experiment on replicate laboratory populations of the common  
31 fruit fly, *Drosophila melanogaster*, subjected to four different combinations of larval and adult  
32 nutritional levels. We also investigate the mechanistic underpinning of the dynamics through a  
33 stage-structured individual-based model that incorporates life-history parameters common to  
34 many holometabolous insect populations. The model captures both the qualitative and the  
35 quantitative nature of the dynamics of each of the four nutritional regimes studied  
36 experimentally. Simulations using the model also resolve an observed discrepancy in terms of  
37 population size and stability between data from an earlier empirical study and our results, thus  
38 demonstrating the importance of quantitative description of the nutritional levels in  
39 understanding population dynamics and stability. Exploration of the model parameter space  
40 produces clear predictions regarding constancy stability of populations, as a consequences of  
41 altering life-history related traits in contrasting nutritional regimes. Data from an earlier  
42 independent experiment are used to validate one of the model predictions. Insights obtained from  
43 this study are useful in understanding the interaction of ecology and life-history in shaping the  
44 evolutionary dynamics of populations with life-cycles similar to *Drosophila*.

## 45 1. INTRODUCTION

46 The laboratory ecology of *Drosophila melanogaster* has been investigated for more than half a  
47 century . This has led to a rich body of knowledge on the effects of various density-dependent  
48 factors on the population dynamics of laboratory cultures of this species (reviewed by Mueller  
49 1985; Mueller and Joshi 2000). Briefly, three density-dependent feedback loops — effects of  
50 larval crowding on larval survivorship and adult fecundity, and effects of adult crowding on  
51 adult fecundity — are thought to be the primary drivers of the dynamics of *Drosophila*  
52 populations maintained in discrete generation cultures (reviewed in Mueller and Joshi 2000).  
53 Several recursion functions that incorporate one or more of these density-dependent feedback  
54 mechanisms have also been proposed to model the dynamics of *D. melanogaster* laboratory  
55 cultures. Mueller (Mueller 1988) explicitly incorporated all three density-dependent feedback  
56 mechanisms into a single recursion as:  $n_{t+1} = \frac{1}{2} \cdot G(N_t) \cdot F(Vn_t) \cdot W(Vn_t) \cdot V \cdot n_t$ , where  $n_t$  and  $N_t$   
57 represent the number of eggs and adults in generation  $t$ , respectively,  $1 - V$  is the density-  
58 independent probability of larval mortality,  $W(Vn_t)$  and  $F(Vn_t)$  are the functions representing the  
59 effects of larval density on larval survivorship and adult fecundity, respectively, and  $G(N_t)$  is the  
60 function reflecting the effect of adult density on adult fecundity. This model remains the most  
61 detailed abstraction of *D. melanogaster* dynamics in the literature and gave rise to several  
62 interesting predictions that were subsequently verified empirically. One of the most  
63 consequential predictions was that the dynamics of *D. melanogaster* populations could be  
64 stabilized or destabilized by altering the strength of these three feedback loops. More  
65 specifically, it was predicted (Mueller 1988), and experimentally demonstrated (Mueller and  
66 Huynh 1994), that a combination of low food available to the larvae, and addition of live yeast  
67 paste to the food available to the adults, can lead to regular oscillations in adult numbers from

68 generation to generation. On the other hand, excess food available to the larvae, together with no  
69 yeast supplement for the adults, stabilizes the dynamics (Mueller and Huynh 1994) and reduces  
70 the intrinsic growth rate of the populations (Sheeba and Joshi 1998). These observations clearly  
71 demonstrate that manipulating the quantity/quality of food provided to the larvae/adults can alter  
72 the gross dynamics of the *D. melanogaster* populations.

73 Despite this rich body of work, several aspects of *Drosophila* population dynamics in the  
74 laboratory still remain poorly understood. For example, although we know about the role of  
75 larval and adult nutrition in affecting population stability, it is still not clear if and how the  
76 various life-history parameters like hatchability, and critical mass for pupation, interact with  
77 these nutritional regimes. Moreover, although it has been shown that the stability properties of  
78 single populations are greatly affected by the mean, skewness and the position of the various  
79 quartiles for population size (Tung et al. 2014), there is little theoretical or empirical  
80 understanding of how these nutritional regimes affect the various aspects of the population size  
81 distribution in *Drosophila*. There are two primary reasons for these lacunae. First, the absence of  
82 empirical datasets of sufficient length (although see Mueller et al. 2000) over multiple nutritional  
83 regimes precludes meaningful investigation of population size distributions. Second, most  
84 models of *Drosophila* dynamics are deterministic, which rules out an exploration of the  
85 population size distributions, except in the chaotic regime. This has limited the study of the  
86 dynamics of *Drosophila* populations to stability properties (CV, autocorrelations) and average  
87 population sizes, thus missing out on several interesting aspects of the dynamics with potentially  
88 important explanatory power.

89 In order to be able to resolve some of these issues, we conducted a 49-generation long  
90 experiment to describe the main features of the dynamics of laboratory populations of

91 *Drosophila melanogaster* subjected to four different nutritional regimes. We also simulated a  
92 stochastic model of *Drosophila* population dynamics to generate time series data similar to our  
93 experiments. We then compared the experimental data with our simulation results to show that  
94 our model is able to capture various qualitative and quantitative aspects of *Drosophila*  
95 population dynamics. We then demonstrated the usefulness of our model in three ways. First, we  
96 used it to resolve a discrepancy between observations from an earlier study and our results.  
97 Second, we used it to generate clear predictions about how the various life-history parameters  
98 affect the dynamics of the populations under the various nutritional regimes. Third, we used data  
99 from a previous experimental study to validate some of these predictions. In the process, we  
100 again showed how our model is able to capture the various qualitative and quantitative aspects of  
101 differences in the dynamics of *Drosophila* populations that had undergone genetic differentiation  
102 in the laboratory, in addition to capturing the dynamic effects of different nutritional regimes.

103

## 104 **2. MATERIALS AND METHODS**

### 105 **2.1 Laboratory ecology of *Drosophila melanogaster*:**

106 In laboratory cultures of *D. melanogaster*, if the larval crowding is high, the mean amount of  
107 food available per larva is reduced. As a result, a large proportion of larvae are unable to attain  
108 the critical body mass needed for successful pupation, thus increasing larval mortality (Bakker  
109 1961). Since the body size of the adults depends mainly on the amount of resources gathered  
110 during the larval stage, the adults emerging out of crowded cultures are generally small in size  
111 (Marks 1982) and exhibit low fecundity (Chiang and Hodson 1950). Adult fecundity is also  
112 reduced with increasing density of adults in a culture and this is generally attributed to increased

113 interference with egg laying (Pearl 1932). Interestingly, this negative effect of adult density on  
114 fecundity can be ameliorated by supplying the adults with excess amount of live yeast paste  
115 (Mueller and Huynh 1994). Since survival and fecundity are the major factors affecting the  
116 growth rate of a population, it seems plausible that these three density-dependent feedback loops  
117 — effects of larval crowding on larval survivorship and adult fecundity, and effects of adult  
118 crowding on adult fecundity — can play a major role in determining the dynamics and stability  
119 of *D. melanogaster* populations in the laboratory (Mueller and Joshi 2000).

120

## 121 **2.2 Experiment**

122 The experiment comprised of thirty-two populations of *D. melanogaster*, each represented by a  
123 single vial (9 cm h × 2.4 cm dia.) culture. These populations were derived from a long standing,  
124 large outbred population (JB<sub>1</sub>), maintained on a 21-day discrete generation cycle. Details of the  
125 ancestry and maintenance protocol of the JB populations can be found elsewhere (Sheeba et al.  
126 1998), and are not germane to this study. These 32 populations were randomly allotted to one of  
127 four nutritional regimes, such that there were eight populations per regime. Following  
128 established norms (Mueller and Huynh 1994; Mueller et al. 2000) these regimes were called HH,  
129 HL, LH, LL — where the first letter indicates the quantity of larval food and the second letter  
130 represents the status of adult nutrition. In case of larval food, H and L denoted ~6 mL and ~2 mL  
131 of banana-jaggery medium, respectively, whereas in the case of adult nutrition, H and L referred,  
132 respectively, to the presence and absence of live yeast paste supplement to banana-jaggery  
133 medium. Thus, for example, HL denotes a nutritional regime comprising of ~6 mL medium for  
134 the larvae, but no live yeast paste supplement for the adults, and so on.

135 Each population was initiated (generation 0) with eight male and eight female flies, and from this  
136 point onwards (except for extinction) there was no direct control on the number of adults in a  
137 vial. After oviposition in the vial for 24 hours, the adults were counted and discarded and the  
138 eggs formed the next generation. Once the adults started eclosing in these vials, they were  
139 transferred to adult collection vials every day with a change of medium every alternate day.  
140 Strict vial-to-vial correspondence was maintained between the egg vials and their corresponding  
141 adult collection vials. The process of adult collection continued till 18 days after egg collection,  
142 after which the flies were conditioned for three days in the presence / absence of live yeast paste.  
143 The live yeast paste is known to boost the fecundity of the females (Chippindale et al. 1993) and  
144 reduce the effect of adult density on adult fecundity (Mueller and Huynh 1994). On day 21 after  
145 egg collection, the adults were transferred to fresh food vials containing ~2 mL or ~6 mL of  
146 banana-jaggery medium and allowed to lay eggs for 24 hours. After this period, the adults were  
147 counted and discarded, while the eggs formed the next generation. If there were no adults in a  
148 population, then an extinction event was recorded and the population was rescued using four  
149 male and four female flies from the ancestral JB<sub>1</sub> population.

150 The complete details of this experiment have been reported in the PhD thesis of one of the  
151 authors (Dey 2007).

152

### 153 **2.3 Statistical analyses**

154 Distributional properties of the experimental time series were assessed using mean, median, 5<sup>th</sup>,  
155 10<sup>th</sup>, 25<sup>th</sup>, 75<sup>th</sup>, 90<sup>th</sup> and 95<sup>th</sup> percentiles in the box plot (Zar 1999). The constancy stability

156 (Grimm and Wissel 1997) of the populations was measured as fluctuation index (*FI*, Dey and  
157 Joshi 2006) which is given as:

$$FI = \frac{1}{T \times \bar{N}} \times \sum_{i=1}^{T-1} |N_{t+1} - N_t|$$

158

159 where  $\bar{N}$  is the mean population size over  $T$  generations and  $N_{t+1}$  and  $N_t$  are the population sizes  
160 at  $(t+1)^{\text{th}}$  and  $t^{\text{th}}$  generation, respectively.

161 In order to investigate the interaction among larval and adult nutritional regimes, the *FI* data  
162 were subjected to a two-way ANOVA with larval nutrition (fixed factor, two levels: Low and  
163 High) crossed with adult nutrition (fixed factor, two levels: Low and High). All statistical  
164 analyses were performed using STATISTICA<sup>®</sup> v5 (StatSoft. Inc., Tulsa, Oklahoma).

165

## 166 **2.4 The model and simulations**

### 167 *2.4.1 Model formulation*

168 The model can be divided into two modules: pre-adult and adult. For a given generation  $t$ , the  
169 pre-adult module takes the number of eggs and the total amount of larval food as input and  
170 computes the number of viable adults and the body size of each of those adults as an output. The  
171 output of the pre-adult module and the nature of the adult food available act as inputs for the  
172 adult module and the output is the total number of eggs produced that form the input for the pre-  
173 adult module in generation  $t + 1$ . Thus, although our model produces the adult numbers in each  
174 generation, structurally it is an egg-to-egg recursion. This modeling strategy has been employed  
175 earlier (Mueller 1988), and is preferred over an adult-to-adult recursion. This is because, due to



176 density-dependent mortality, for a given amount of larval food, the relationship between adult  
 177 numbers and the corresponding number of eggs from which they have arisen is single-humped  
 178 (Chiang and Hodson 1950). Consequently, although a given number of eggs leads to similar  
 179 number of adults, a given number of adults, in principle, can arise from differing number of eggs  
 180 (Prout and McChesney 1985). Thus, for example, assuming say 10% mortality at low crowding,  
 181 10 eggs will always lead to ~9 adults. However, if one sees 9 adults, this could have arisen from  
 182 10 eggs (assuming 10% mortality at low crowding) or 100 eggs (assuming say 91% mortality at  
 183 high crowding). Thus, tracking the adult numbers is never sufficient for the purpose of modeling  
 184 *Drosophila* dynamics (Prout and McChesney 1985), and hence egg-to-egg recursions are  
 185 preferred.

186

187

**Table 1: List of parameters used in the model**

| Parameter            | Description                                                                       | Value                                  |
|----------------------|-----------------------------------------------------------------------------------|----------------------------------------|
| <i>food</i>          | Amount of larval food present                                                     | 1.76 (LL and LH) and 2.56 (HL and HH)  |
| <i>adnut</i>         | Quality of adult nutrition/fecundity booster                                      | 1 (LL and HL), 1.29 (HH) and 1.49 (LH) |
| <i>hatchability</i>  | Egg-to-larval viability                                                           | 0.98                                   |
| <i>m<sub>c</sub></i> | Critical mass <i>i.e.</i> the minimum mass/size required to become a viable adult | 1.1 (JB) and 1 (FEJ)                   |
| <i>sen_adden</i>     | The coefficient of sensitivity of female-fecundity to adult density               | 0.17                                   |
| <i>sen_adsiz</i>     | The coefficient of sensitivity of female-fecundity to adult size                  | 1.7                                    |
| <i>sigma_size</i>    | Standard deviation of larval body size distribution                               | 0.45                                   |
| x <sub>1</sub>       | Scaling constant                                                                  | 2.5                                    |
| x <sub>2</sub>       | Scaling constant                                                                  | 1                                      |
| x <sub>3</sub>       | Scaling constant                                                                  | 0.009                                  |
| x <sub>4</sub>       | Scaling constant                                                                  | 2                                      |
| x <sub>5</sub>       | Scaling constant                                                                  | 85                                     |

188

189 Each module is described in detail below. The numerical values of all parameters and scaling  
190 constants are presented in Table 1.

#### 191 2.4.2 *Pre-adult module:*

192 This module starts with a given number of eggs (*numegg*) and assumes that only a fixed fraction  
193 (*hatchability*) of them will hatch into larvae, due to density-independent mortality. Thus, the  
194 number of viable larvae is given by

$$195 \quad \text{numlarva} = \text{hatchability} \times \text{numegg} \dots\dots\dots(1)$$

196 In a *Drosophila* culture, the newly hatched larvae eat the larval food provided and grow in size.  
197 Due to among-individual variation in traits like larval feeding rate, food-to-biomass conversion  
198 efficiency etc., a distribution of larval body sizes ensues at the end of the larval growth period  
199 (Bakker 1961). When the number of larvae in the food is increased, the amount of food available  
200 per larva is reduced which, in turn, reduces the average body-size attained at the end of the larval  
201 stage (Chiang and Hodson 1950; Miller and Thomas 1958). We assumed the distribution of  
202 larval body sizes at the end of feeding to be normal with a mean (*mean\_size*) that was an  
203 increasing function of the total amount of larval food (*food*), but a decreasing function of the  
204 number of larvae (*numlarva*). Specifically,

$$205 \quad \text{mean\_size} = x_1 \times (1 - 1 / (x_2 + \exp(-x_3 \times \text{numlarva} + \text{food}))) \dots\dots\dots(2)$$

206 where  $x_1$ ,  $x_2$  and  $x_3$  are scaling constants and  $\exp$  is the exponential function. For the sake of  
207 simplicity, standard deviation (*sigma\_size*) of the body-size distribution was kept as a density-  
208 independent constant. Computationally, once *numlarva* is calculated from equation 1, each larva  
209 is assigned a body size value by drawing random numbers from a  $N(\text{mean\_size}, \text{sigma\_size})$   
210 distribution.

211 In order to complete metamorphosis and become an adult, *Drosophila* larvae, like in many other  
212 insect species (Davidowitz et al. 2003), need to attain a critical minimum larval size before  
213 pupation (Bakker 1961; Robertson 1963). To incorporate this phenomenon into our model, we  
214 considered critical size ( $m_c$ ) to be a density-independent constant (following Mueller 1988) and  
215 compared the size of each larvae against it. All larvae whose body size was less than  $m_c$  were  
216 considered to have failed in becoming adults. The number of remaining larvae is considered to  
217 be the adult population size ( $numadult$ ) of the current generation.

218

219 Empirical studies indicate a positive correlation between larval and adult body size in  
220 *Drosophila* (Bakker 1961). Therefore, we considered adult body size to be a linear function of  
221 larval body size, i.e.

$$222 \quad size\_adult_i = x_4 \times size\_larva_i \dots\dots\dots(3)$$

223 where  $size\_adult_i$  and  $size\_larva_i$  denote the body size of the  $i^{\text{th}}$  larva and the corresponding adult  
224 respectively ( $size\_larva_i > m_c$ ) and  $x_4$  is a scaling constant.

225 Thus, the pre-adult module takes a life-history variable ( $numegg$ ) as an input and gives two life-  
226 history related variables, number of adults ( $numadult$ ) and the distribution of the adult body sizes  
227 ( $size\_adult_i$ ), as output.

228 Recently, it has been discovered that *Drosophila* larvae can exhibit cannibalism under conditions  
229 of extreme food deprivation (Vijendravarma et al. 2013). However, we chose not to incorporate  
230 this phenomenon in the model since the extent of cannibalism among the larvae under the kind of  
231 crowding found in our populations is still not known. More critically, there is no evidence till  
232 date to indicate that this is a density-dependent phenomenon. If we assume larval cannibalism to

233 be density-independent, then this phenomenon can be easily incorporated into our model by  
234 multiplying *numadult* with another constant.

#### 235 2.4.3 *Adult module:*

236 The first task in this module is to assign a gender to each adult individual, based on the expected  
237 adult sex-ratio in the population. For this, a random number is drawn from  $U(0, 1)$  for each  
238 adult. If the number is greater than the expected frequency of females in the population, then the  
239 individual is assigned to be a male, and vice versa. In this study, sex-ratio was considered to be  
240 independent of adult numbers and was always taken to be 1:1. However, due to the inherent  
241 stochasticity of the process, the realized sex ratio could deviate slightly from 1:1, which is  
242 biologically realistic, particularly in small populations of the kind that we were studying.

243 *Drosophila* is a sexually dimorphic species with the females being significantly larger than the  
244 males. Therefore, ideally, only the heaviest individuals should have been designated as females.  
245 However, we ignore this complication in our model and assign sex randomly,

246 After the assignment of sex, fecundity of the females is computed based on their body size and  
247 current adult density. In many holometabolous insects, including *Drosophila*, fecundity or egg  
248 laying ability is positively correlated with the body size of the females (Honěk 1993). However,  
249 given that the capacity of the female abdomen to hold eggs is finite, it is biologically realistic to  
250 assume that there would be an upper limit to the number of eggs that the female could possibly  
251 lay. Considering these two observations together, the density-independent fecundity is taken to  
252 be a logarithmic function of the female body size. Finally, live yeast paste is known to boost  
253 female fecundity irrespective of the density (Mueller and Huynh 1994). To incorporate this  
254 phenomenon, an explicit, density-independent constant (*adnut*) is added to the model. This

255 allows us to simulate the effects of adult nutrition by altering the value of *adnut*. Taken together,  
256 the adult density-independent component of female fecundity can be represented as:

$$257 \text{ dens\_ind\_fec}_i = \text{adnut} \times x_5 \times \log(x_6 + \text{sen\_adsize} \times \text{size\_adult}_i) \dots \dots \dots (4)$$

258 where *sen\_adsize* is the strength of relationship between female-fecundity and adult body size  
259 and  $x_5$  and  $x_6$  are scaling constants. The parameter *sen\_adsize* can be thought of as that part of  
260 the total resources of the body size that is allotted to fecundity. It should be noted here that in the  
261 above formulation, two of the constants (*adnut* and  $x_5$ ) can easily be combined to create a single  
262 constant. However, we refrain from that in order to retain the ease of biological interpretation.

263 Another important factor that reduces per capita female fecundity in insects is adult density  
264 (Mueller 1988; Rich 1956). Following an earlier study (Mueller 1988) we modeled this  
265 relationship using a hyperbolic equation as

$$266 \text{ dens\_eff} = (1 / (1 + \text{sen\_addn} \times \text{numadult})) \dots \dots \dots (5)$$

267 where *sen\_addn* is the sensitivity of female-fecundity to adult density,

268 Combining equations 5 and 6, the fecundity of the  $i^{\text{th}}$  female is given as:

$$269 \text{ fec}_i = \text{dens\_ind\_fec}_i \times \text{dens\_eff} \dots \dots \dots (6)$$

270 such that the number of eggs in the next generation,

$$271 \text{ numegg}_{t+1} = \sum_i \text{fec}_i \dots \dots \dots (7)$$

272 Thus, the adult module takes two life-history related parameters from the output of the pre-adult  
273 module and returns the number of eggs in the next generation as the output. This output then  
274 serves as the input for the pre-adult module for the next generation, and thus the iterations  
275 continue.

276 An earlier version of this model, and its correspondence with the experimental data, has been  
277 reported in the Master's Thesis of one of the authors (Tung 2012).

#### 278 2.4.4 Model Parameterization

279 The first step for running the simulations was to obtain the ranges for the different parameter  
280 values. The large number of parameters in the model, coupled with the somewhat short length of  
281 the experimental time series (49 generations), made direct model-fitting difficult. Therefore, we  
282 arbitrarily fixed the values of the scaling constants ( $x_1$ - $x_6$ , Table 1) and heuristically explored the  
283 ranges for the remaining life-history-related parameters (*hatchability*,  $m_c$ , *sen\_adden*, *sen\_adsize*;  
284 Table 1). This led to the parameter values that gave best matches across the various facets of the  
285 population size distribution (mean, median, skewness, range, various quartiles) and FI for two of  
286 the nutritional regimes (LL and HH). Once these parameter values were obtained, we used them  
287 to construct the two other regimes (LH and HL). Thus, for example, in the LH and HL regime,  
288 the value of “food” was the same as that obtained in the LL and HH regime respectively. In  
289 other words, the LL and HH regime were equivalent to “training” datasets while the LH and HL  
290 regime were equivalent to “prediction” datasets. This allowed us to avoid the issue of circularity  
291 in terms of parameterization and judging model performance.

#### 292 2.4.5 Simulations:

293 To investigate the population size distributions, for each nutritional regime (LH, HH, HH or HL),  
294 we simulated eight replicate runs of the model with 49 generations in each replicate, to keep  
295 parity with the experimental data. However, none of our conclusions changed when the length of  
296 the time series was increased (see section 3.7 for discussion). Every simulation run started with  
297 18 eggs. When there was extinction in any generation (i.e. *numadult* = 0), the time series was

298 reset with four females with body size  $=2 \times m_c$ . Following previous studies (Sah et al. 2013; Tung  
299 et al. 2014), we also incorporated additional demographic stochasticity in the model by  
300 considering a 50% chance of extinction, whenever population size went below eight. If  
301 extinction occurred due to demographic stochasticity, the population was reset in the same way  
302 as mentioned above.

303 We also explored the effects of wide ranges of life-history related parameters (*hatchability*,  $m_c$ ,  
304 *sen\_adden*, *sen\_ysize*) on population stability. For each value of a given parameter, we took an  
305 arithmetic mean of *FI* measured over 100 replicate time-series, each of which was 100-  
306 generations long. All other conditions of the simulations were identical to those in the previous  
307 paragraph.

308 Our empirical data revealed that the HL regime had a greater average population size and lower  
309 FI compared to the HH populations (see section 3.5 for details) whereas an earlier study had  
310 shown that the population size of HH was greater than that of HL and the two regimes had  
311 similar constancy stability (Mueller and Huynh 1994). In order to investigate this discrepancy  
312 between the two results, we simulated our model with five different values of larval food ranging  
313 from 3.0 to 7.0 in step size of 1.0. Each value of larval food level (*food*) was crossed with two  
314 values of *adnut* – 1.0 and 1.29- which represented the presence and absence respectively of yeast  
315 for the adults. For each *food*  $\times$  *adnut*, we simulated eight 49-generation long time-series, and  
316 obtained the corresponding population size distribution, FI and egg-to-adult viability. All other  
317 parameter values were identical to the earlier simulations (Table 1).

318

319

## 320 2.4 36-generation simulation and experiment

321 To validate one of the predictions arising from our model, we compared our model output with  
322 the dynamics of four *Drosophila* populations selected for faster development and early  
323 reproduction (henceforth called FEJ<sub>1-4</sub>) for ~125 generations (Dey et al. 2008; Prasad et al.  
324 2003). The FEJ<sub>1-4</sub> lines were derived from four ancestral populations (JB<sub>1-4</sub>), which served as  
325 controls in that experiment. Incidentally, one of these JB populations is the ancestor for the 32  
326 populations mentioned above in section 2.2. For each FEJ<sub>*i*</sub> or JB<sub>*i*</sub> (*i* ∈ 1-4) population  
327 (represented by single vial cultures), there were four replicates each under HL and LH regimes.  
328 Thus, there were 16 FEJ populations and 16 JB populations, that experienced the LH regime and  
329 similarly 16+16 that experienced the HL regime. The maintenance details of this 36-generation  
330 long experiment are given elsewhere (Dey et al. 2008) and are similar to the experimental  
331 protocol of the present study.

332 To use these data, we first re-parameterized our model by reducing the value of  $m_c$  of FEJs from  
333 1.1 to 1.0. This is because it has been suggested that due to selection for faster pre-adult  
334 development, the FEJs had a lower value of  $m_c$  (Prasad et al. 2001). Moreover, to keep parity  
335 with the experimental data, we used 16 replicates each of FEJ and JB in both HL and LH  
336 nutritional regimes, and each replicate was simulated for 36 generations. Every other detail of the  
337 parameter values and the simulation were identical to those mentioned above. We then compared  
338 the population size distributions and *FI* values of the simulations against those observed from the  
339 empirical data. It should be noted here that the empirical *FI* values are identical to those reported  
340 in Figure 2a of the earlier study (Dey et al. 2008) and are being re-plotted here only to facilitate  
341 comparison with the simulation results. The population size distribution data from these  
342 experiments is being reported for the first time in this study.



343

## 344 2.6 Comparisons with a previous model

345 Our model is similar to a previous model of the population dynamics of *Drosophila*  
346 *melanogaster* (Mueller 1988), with two major differences. First, the previous model was fully  
347 deterministic, while ours is individual-based (for larvae and adults). This change allowed us to  
348 study the various properties of the population size distributions and compare them with the  
349 experimental data, which would not have been possible with a deterministic model (except  
350 perhaps for chaotic dynamics). This also allowed us to account for certain biological features that  
351 can have a major impact on population dynamics. For example, allotting the sex of every  
352 individual using a uniform distribution allowed us to account for demographic stochasticity in  
353 the number of females, even though the expected sex ratio was 1:1. The previous model, being  
354 deterministic, assumed that a fixed fraction of the individuals in the population were female.  
355 Second, we considered female fecundity to be a logarithmic (and hence saturating) function of  
356 female body size, whereas in the previous study, it was modeled as an exponential function.  
357 This implies that in the previous study, when body size was large, small differences in size  
358 translated into large differences in fecundity, which was not the case with our model. Overall,  
359 our model is more appropriately considered as an extension of the existing model (Mueller  
360 1988), rather than a completely new model. The major features of the present study are  
361 comparing the performance of this model against empirical data and validating some of the  
362 simulation predictions against experimental data from this and other studies.

363

364

365 **3. RESULTS AND DISCUSSION**

366 **3.1 Experiments: Larval and adult nutritional regimes interact to shape the adult dynamics**

367 A robust and experimentally well-validated prediction in *Drosophila* population biology is that a  
368 combination of limited larval food and boosted adult fecundity (i.e. a LH regime) leads to  
369 regular, large-amplitude oscillations in the temporal dynamics of population size (Mueller and  
370 Huynh 1994). On the other hand, large amount of larval food and no boost to adult fecundity (i.e.  
371 the HL regime), results in irregular, relatively smaller amplitude fluctuations (Mueller and  
372 Huynh 1994). This leads to the question of whether the effects of larval and adult food regimes  
373 are independent of each other or interact to shape the resultant dynamics. Since the four possible  
374 combinations of low/high larval/adult nutrition (i.e. LH, LL, HH and HL) have never been  
375 studied together before, this question has not been empirically addressed till now.

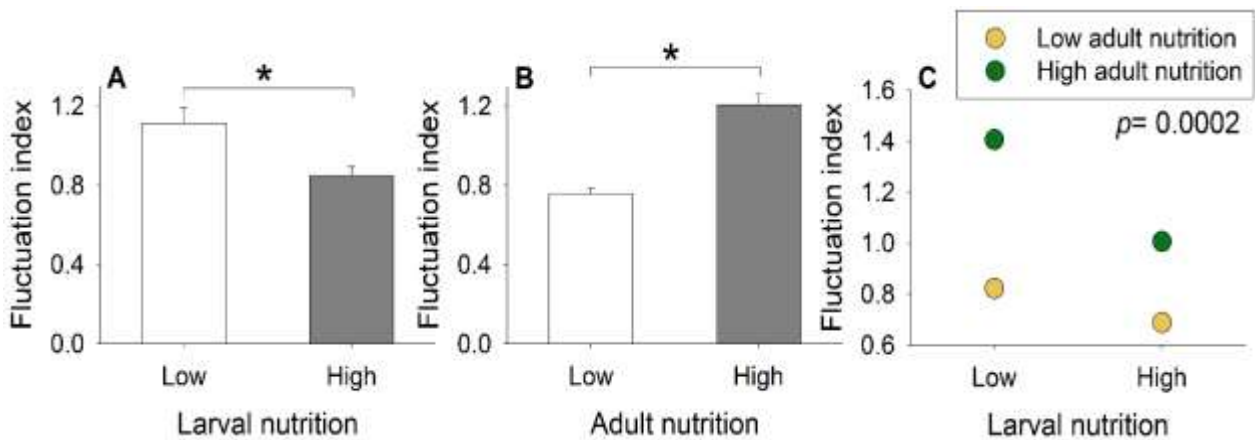

**Figure 1. Effects of larval and adult nutrition on constancy stability.** (A) High larval nutrition decreases fluctuation index and therefore increases constancy stability, whereas (B) high adult nutrition increases fluctuation index and therefore decreases constancy stability. (C) Interaction of larval and adult nutrition to determine constancy stability of population is statistically significant. High adult nutrition destabilizes population more when larval nutrition is low. The error bars represent standard errors around the mean (SEM). In panel (C), error bars are too small to be visible. \* denotes  $p < 0.05$  for the main effect of selection in the ANOVA.

376

377 We found a significant main effect of both larval (Figure 1A,  $F_{1, 28}=71.96$ ,  $p=3\times 10^{-09}$ ) and adult  
378 (Figure 1B,  $F_{1, 28}=205.34$ ,  $p= 2\times 10^{-14}$ ) nutrition on the *FI* of the populations, which was  
379 consistent with the results of earlier studies (Mueller and Huynh 1994). More interestingly, there  
380 was a significant interaction between the two factors ( $F_{1, 28}= 17.92$ ,  $p= 0.0002$ ) suggesting that  
381 enhancing the fecundity of flies (through a supply of yeast) causes a much greater increase in *FI*  
382 when the amount of larval food is limiting (i.e. LL and LH) than when it not limiting (i.e. HL  
383 and HH) (Figure 1C). This is because although both LL and LH experience substantial larval  
384 crowding, the larger fecundity of the LH flies leads to greater larval crowding even with  
385 moderate adult population sizes which, in turn, causes regular population crashes. On the other  
386 hand, even when there are population crashes, the greater fecundity of the LH flies ensures a  
387 high population size in the next generation. Together, these two effects ensure large amplitude  
388 oscillations in LH population sizes, and a substantially larger *FI* than the LLs (Tukey's HSD  $p =$   
389  $0.00016$ ). On the other hand, although the fecundity of the HH populations is larger than those of  
390 the HLs, the non-limiting amount of larval food ensures that the population crashes are only  
391 marginally more severe in the former. This leads to a much lower (although statistically  
392 significant; Tukey's HSD  $p = 0.00017$ ) increase in *FI* in the HH populations, compared to the  
393 HL populations (Figure 1C).

394 The interaction between the larval and the adult nutritional regimes suggests that it is not  
395 possible to use either of those in isolation to predict the adult dynamics. Therefore, from this  
396 point onwards, we investigate the four combinations of nutritional regimes (i.e. LL, LH, HL and  
397 HH) separately.

398

399 **3.2 Experiments: The differences in the dynamics of the populations are reflected in their**  
400 **population size distributions and *FI***

401 We began our investigation with the distributions of population sizes which is ultimately related  
402 to the temporal dynamics of populations. Both larval and adult nutritional levels were found to  
403 affect the population size distributions (Figure 2A, the white boxes). Specifically, when larval  
404 food is less, population size distributions have lower values of mean, median, 25<sup>th</sup> percentiles  
405 and 75<sup>th</sup> percentiles, compared to the case when larval food is high (*cf* LH with HH and LL with  
406 HL in Figure 2A). Interestingly, irrespective of the level of larval nutrition, providing yeast to the  
407 adults reduced the population sizes (*cf* LH with LL and HH with HL in Figure 2A). Moreover, in  
408 the LH and HH regimes (Figure 2A), the population size distributions are much more skewed to  
409 the left (i.e. median < mean), which is indicative of crashes in population numbers from various  
410 medium to high population sizes (see also figure 4 in Dey and Joshi 2013). All these  
411 observations are due to the fact that low levels of larval food or increased adult fecundity  
412 increase the larval crowding by reducing the per-capita food available to the larvae.

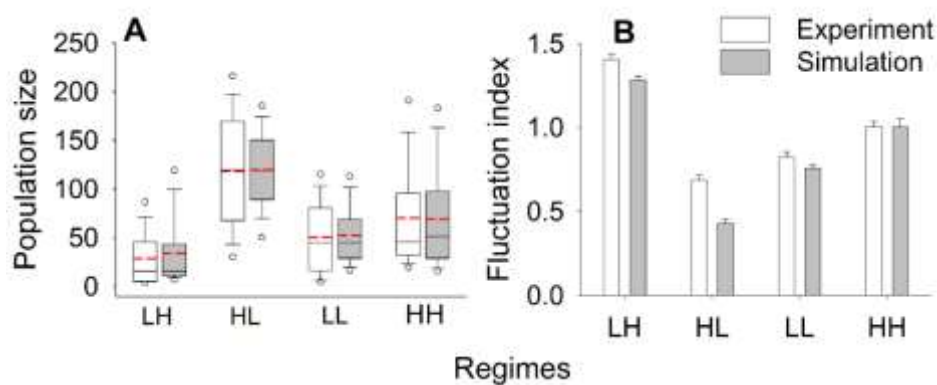

**Figure 2. Population size distribution and constancy stability of experimental and simulated time-series.** (A) Descriptive statistics of the population size distributions. Red dashed lines = means, thin black lines = medians, edges of the boxes=25<sup>th</sup> and 75<sup>th</sup> percentiles, whiskers=10<sup>th</sup> and 90<sup>th</sup> percentiles and the circles outside = 5<sup>th</sup> and 95<sup>th</sup> percentiles of the distributions. White boxes represent experimental data while grey shaded boxes are for

simulated time-series. **(B)** Average ( $\pm$  SEM) *FI* of the experimental and simulated time-series in the four regimes. Both plots suggested a good agreement between the experiments and the simulations. The populations in the HL regime were the most stable with highest average population size while those in the LH regime were the least stable with lowest population size.

413

414 Consequently, fewer larvae are able to acquire a body mass greater than  $m_c$ , which reduces the  
415 egg-to-adult survivorship, and hence the adult population sizes. Interestingly, the mean and the  
416 median population sizes were very close for the HL populations, but not so for the other three  
417 (Figure 2A). This showed that the population size distributions of HL had little or no skew, while  
418 the other three regimes exhibited positive skewness. This implied that in spite of having a larger  
419 average population size compared to the other three regimes, the HL populations exhibited lower  
420 amplitude fluctuations relative to their own mean population size. Thus, not surprisingly, the HL  
421 populations were found to have the lowest *FI* (Figure 2B) amongst the four regimes.

422 Post-hoc test (Tukey's HSD) on *FIs* of the four nutritional regimes revealed all pair-wise  
423 differences to be significant with the rank order: LH > HH > LL > HL (Figure 2B, the white  
424 bars). Although these four regimes have never been studied together till date, subsets of them  
425 have been studied in all kinds of combinations. Thus, it has been shown that in terms of  
426 constancy stability LH < HL ~ HH (Mueller and Huynh 1994), LH < HL and LH < LL (Dey and  
427 Joshi 2013). Our results (Figure 2B) are in excellent agreement with all these studies except  
428 those of Mueller and Huynh (1994) who showed theoretically and empirically, that the constancy  
429 stability of HL and HH were not different. Moreover, Mueller and Huynh (Mueller and Huynh  
430 1994) also predicted the average population size of the HH regime to be much larger than that of  
431 the HL regime, which also did not match our observations (Figure 2A). We resolve this issue  
432 later in this study (section 3.5) using our individual-based model of *Drosophila* dynamics.

433

434 **3.3 Simulations: High level of correspondence between the experimental data and the**  
435 **model output**

436 The simulation results (grey bars) matched the various salient features of population size  
437 distribution (Figure 2A) and population stability (Figure 2B) in the empirical observations in all  
438 four nutritional regimes. To the best of our knowledge, there are no models of *Drosophila*  
439 dynamics whose predictions have been verified in this detail with experimental data. This is  
440 more a reflection on the paucity of good quality long time series data, rather than any  
441 shortcoming on the part of the modelers. In fact, in the context of dynamics of laboratory  
442 populations of *Drosophila melanogaster*, our 49 generation data-set is perhaps the second-  
443 longest in the literature in terms of number of generations.

444 Although the model did an excellent job in capturing the quantitative aspects of the experimental  
445 data, these details (and therefore the parameter values that lead to them) are obviously  
446 experiment-specific and shall vary across studies. Therefore, the usefulness of our model is more  
447 in terms of the mechanistic understanding that it generates about how the dynamics is affected by  
448 the interaction of various life-history and environmental variables. That was our next object of  
449 investigation.

450

451 **3.4 Simulations: The effects of various life-history related traits on dynamics**

452 **3.4.1 Hatchability (*hatchability*) and critical mass ( $m_c$ ):**

453 Our model predicted that population *FI* decreases (i.e. constancy stability increases) with  
454 decreasing hatchability of the eggs in all four regimes (Figure 3A). This is because a reduced  
455 hatchability in generation  $t$  is conceptually equivalent to reduced fecundity in generation  $t-1$ ,

456 which is known to be a stabilizing factor (Mueller 1988). As expected, the destabilizing effect of  
457 increasing hatchability is more pronounced where the larval crowding is already very high (LH)  
458 and is mildest where larval crowding is the lowest (i.e. HL).

459 Like hatchability, increasing larval critical mass ( $m_c$ ) also has a negative effect on constancy  
460 stability (Figure 3B). This works in two ways. First, all else being equal, increasing  $m_c$  means  
461 that fewer larvae would be able to attain  $m_c$ , which would reduce larval survivorship. This is  
462 analogous to reducing survivorship through reduced larval food amount, which is a destabilizing  
463 factor. Secondly, increasing  $m_c$  means on an average, the surviving adults would have a greater  
464 body size, which would translate into larger fecundity and thus, destabilize the dynamics. Thus,  
465 decreasing  $m_c$  is always expected to stabilize the dynamics (Mueller 1988): a prediction that we  
466 return to in section 3.6.

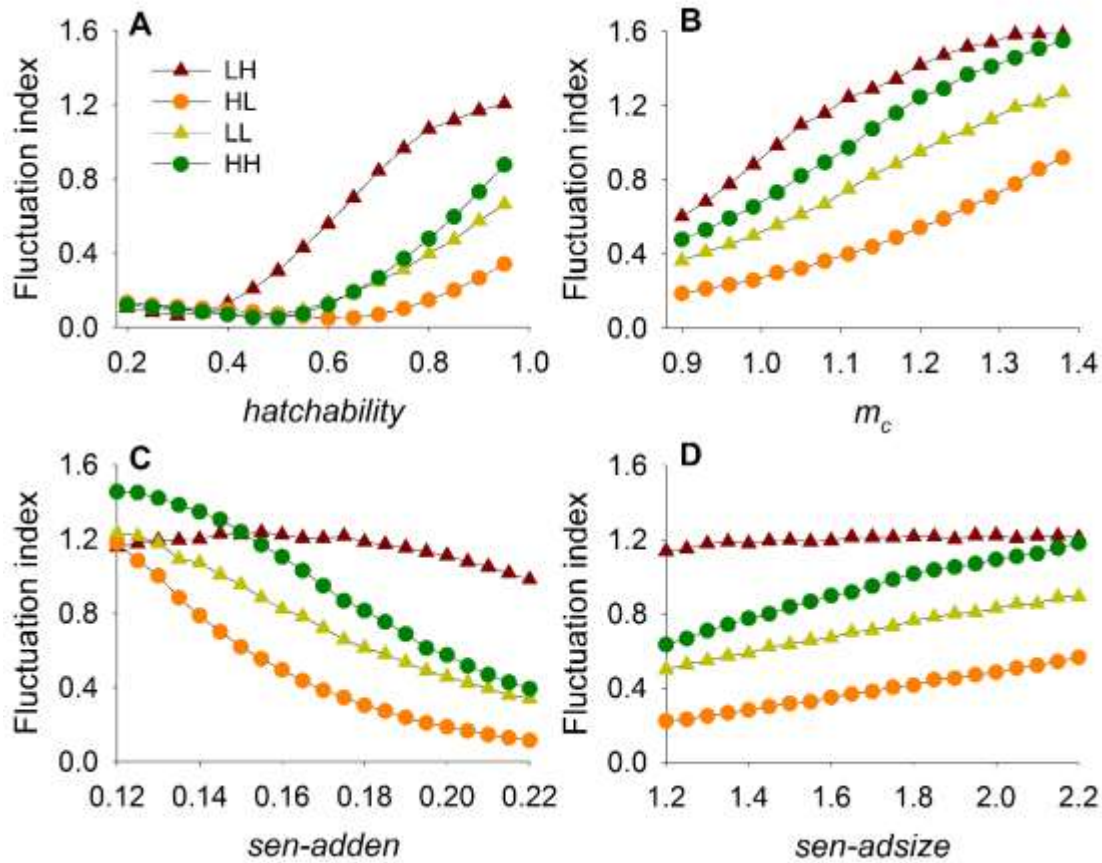

**Figure 3. Effect of varying life-history related parameters of the model on constancy stability.** Each point represents average ( $\pm$  SEM) fluctuation index of 100 replicates of 100-gen long simulated time series. Error bars are too small to be visible. **(A)** In all four regimes, as *hatchability* reduces, larval density also reduces and thus populations become more stable. **(B)** As critical mass increases, the populations become more destabilized. **(C)** Increasing the sensitivity of female-fecundity to adult density (*sen\_adden*) increases constancy stability in all regimes except LH. **(D)** Increasing the sensitivity of female-fecundity to adult body size (*sen\_adsiz*), reduces constancy stability in all regimes except LH. See section 3.4.2 for explanations for the anomalous behaviors in the LH regime.

467



468 3.4.2 Sensitivity of adult density (*sen\_adden*) and adult body size (*sen\_adsize*) to female  
469 fecundity:

470 Adult density is known to negatively affect female fecundity in *Drosophila melanogaster*  
471 (Mueller and Huynh 1994). In our model, *sen\_adden* determines the strength of this effect, such  
472 that for same adult density, greater *sen\_adden* results in lesser fecundity. This in turn enhances  
473 larval survivorship, by increasing the amount of food available per capita, which has a stabilizing  
474 effect on the dynamics. On the other hand, *sen\_adsize* determines the strength of the positive  
475 correlation between body size and fecundity, such that increasing *sen\_adsize* will increase  
476 fecundity, thereby reducing larval survivorship, ultimately leading to destabilized dynamics. In a  
477 nutshell, increase in *sen\_adden* and decrease in *sen\_adsize* is expected to lead to a stabilization  
478 of the population dynamics. Our simulation results agreed with this prediction in all the regimes  
479 except LH (Figure 3C and 3D). In the LH regime, both *sen\_adden* and *sen\_adsize* seemed to  
480 have little effect on *FI*, even though, reducing *sen\_adden* and increasing *sen\_adsize* caused the  
481 total egg number to go up (Figure S1A and S1C). The reason for this unintuitive behaviour was  
482 revealed when we investigated the effect of these two parameters on the egg-to-adult  
483 survivorship. Increasing *sen\_adden* (Figure S1B), or decreasing *sen\_adsize* (Figure S1D), hardly  
484 affected the egg-to-adult viability in the LH regime. This is because the very low levels of larval  
485 food ensured that even with reduced fecundity, there was substantial larval crowding in this  
486 regime so that there was almost no effect of changing *sen\_adden* or *sen\_adsize* on larval  
487 mortality. As a result, the destabilizing effect of increasing fecundity was not seen in the LH  
488 populations. The primary insight here is that even in the highly simplified dynamics under  
489 laboratory conditions, the environment can interact with the life-history parameters of the  
490 organisms to lead to very counter-intuitive effects on the dynamics.

491 **3.5 Simulations and Experiments: Population dynamics is shaped jointly by the quality and**  
492 **quantity of nutrition**

493 As stated already, one of our empirical results did not match the observations of an earlier study  
494 (Mueller and Huynh 1994). We found that HL populations had greater constancy stability and  
495 larger average size than the HH populations whereas Mueller and Huynh (Mueller and Huynh  
496 1994) reported that the HH populations had similar constancy stability but much greater average  
497 size than the HL populations. The primary difference between the two experiments was in terms  
498 of the amount of food given to the larva. In the previous experiment, the HL and HH larva got 40  
499 mL of food in a 250 mL bottle while in our experiment the corresponding larva got ~6 mL food  
500 in a 37 mL vial. Consequently, the adult population sizes in the HL and HH regime varied in the  
501 range of ~40-240 in our experiment, but ~ 400-1600 in the previous experiment.

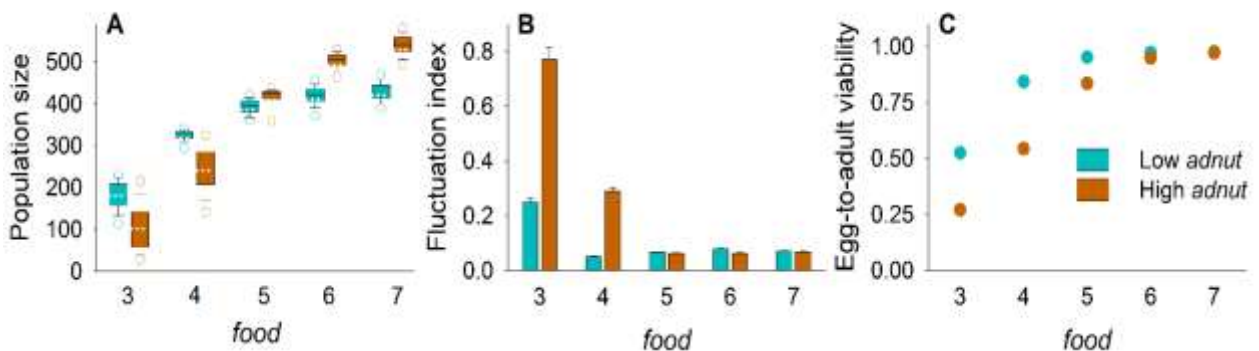

**Figure 4. Simulations on effects of varying larval nutrition on population dynamics.** (A) Population size distributions for the simulated time-series under low *adnut* (cyan) and high *adnut* (orange) conditions for different levels of larval food amount (*food*). White dotted lines = means, thin black lines = medians and the circles outside = 5<sup>th</sup> and 95<sup>th</sup> percentiles of the distributions. The relative positions of the population size distribution of low *adnut* and high *adnut* regimes reverses as the larval food amount increases. (B) Average ( $\pm$  SEM) fluctuation index of the low *adnut* and high *adnut* regimes become comparable, when the level of larval food is high. (C) Although the low *adnut* regimes have greater average ( $\pm$  SEM) egg-to-adult viability than the high *adnut* regime for low values of *food*, the viabilities become comparable as *food* increases. Error bars are too small to be visible here.

502

503 To investigate whether the differences in the larval food amount could explain the observed  
504 discrepancies, we simulated the HH and HL regime for different levels of larval food, keeping all  
505 other parameters the same as in the earlier simulation. We found that as the level of larval food  
506 increases, the relationship between the population size distribution of HH and HL reverses  
507 (Figure 4A). Furthermore, with increasing value of larval food, the *FI* of HH regime reduces and  
508 approaches the same value of HL regime (Figure 4B). The underlying mechanisms behind these  
509 observations can be understood as follows.

510 Due to the availability of yeast paste to the adults in the HH regime, the per-capita fecundity of  
511 the females is very high. Consequently, when the amount of larval food is less (as in our  
512 experiment) there is larval crowding which reduces the survivorship in the HH regime.  
513 Therefore, with increasing levels of food, the survivorship increases (as in Figure 4C), which is  
514 manifested as increased population size in the HH regime (Figure 4A, red boxes). The HL  
515 populations also face some amount of larval crowding at lower levels of food. However, since  
516 they do not have increased fecundity at high adult population sizes (due to the absence of yeast),  
517 the increase in population size plateaus off at a much lower level of food (Figure 4A, blue  
518 boxes).

519 In order to visualize the effects of increased food amount on constancy stability, we need to  
520 appreciate that reduced larval crowding has two opposing effects on the dynamics. First, it  
521 stabilizes the dynamics by reducing larval mortality. At the same time, it can destabilize the  
522 dynamics by increasing the body size of the females at eclosion. As the larval food level  
523 increases, both these factors come into play. However, as there are upper bounds to both  
524 survivorship (=1) and the body size of the flies (= the physiological limit of body size), beyond a  
525 certain amount of larval food, both these factors cease to play a major role, and the *FI* in both

526 regimes become similar. This can be clearly seen in Figure 4B and explains why in the presence  
527 of large amount of larval food, HL and HH populations have similar constancy, as reported  
528 previously (Mueller and Huynh 1994). When the amount of larval food is small, the destabilizing  
529 effect of reduced survivorship overpowers the stabilizing effect of diminished fecundity due to  
530 reduced body size. This is because there is a minimum value for the body size ( $= m_c$ ), which  
531 automatically places a lower bound on the fecundity of the flies irrespective of the level of larval  
532 crowding. Since the HH populations experience greater larval crowding than the HL, they are  
533 expected to have lower constancy, as seen in our experiments (Figure 2B, white bars) and  
534 simulations (Figure 2B, grey bars).

535 In the *Drosophila* population dynamics literature, labels like LH and HL have typically been  
536 used as qualitative descriptors to signify the levels of larval crowding (highly crowded *versus* un-  
537 crowded) and state of adult nutrition (yeasted *versus* un-yeasted). As described in the  
538 Introduction section, this categorization has broad explanatory power in terms of the nature of  
539 the dynamics: LH leads to high amplitude oscillations while HL leads to relatively stable  
540 dynamics. However, the above comparison between the HL and HH regimes from the two  
541 different studies shows that changing just one environmental parameter (here, the quantity of  
542 larval food) can lead to a rich array of dynamics. This again highlights how the actual values of  
543 the environmental parameters interact with life-history related traits in determining population  
544 dynamics.

545 3.6 Simulations and Experiments: Reduction in  $m_c$  is one way for population stability to  
546 evolve

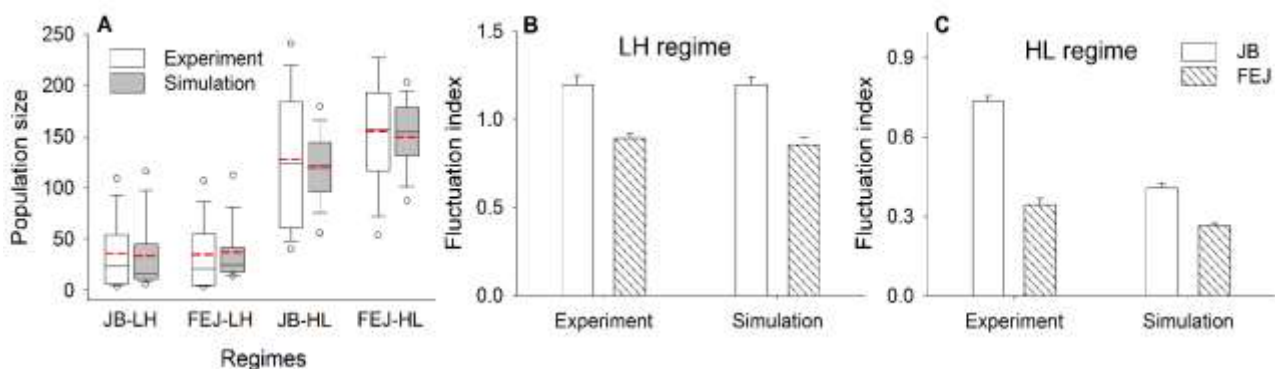

**Figure 5. Validating model predictions on JB and FEJ populations.** (A) Descriptive statistics of the population size distributions of experimental and simulated JB and FEJ populations. Red dashed lines = means, thin black lines = medians, edges of the boxes=25<sup>th</sup> and 75<sup>th</sup> percentiles, whiskers=10<sup>th</sup> and 90<sup>th</sup> percentiles and the circles outside = 5<sup>th</sup> and 95<sup>th</sup> percentiles of the distributions. White boxes represent experimental data while grey shaded boxes denote simulated time-series. Average ( $\pm$  SEM) *FI* of JB and FEJ populations corresponding to the experimental and simulated time-series under (B) LH and (C) HL regimes. Experimental data shows that in both the regimes, FEJs have lower *FI* than the JBs, as predicted by the model. Simulated FEJ populations capture well the empirical trends for population size distribution and constancy stability.

547

548 One of the predictions of our model is that decreasing  $m_c$  should lead to stabilization of the

549 dynamics (Figure 3B and Section 3.4.2). This prediction is consistent with earlier theoretical

550 studies (Mueller 1988) and has been empirically validated using laboratory populations of *D.*

551 *melanogaster* (Dey et al. 2008; Prasad et al. 2003). These earlier experiments used a population

552 of flies (FEJs) that had reduced  $m_c$  as a correlated response to selection for faster development

553 and early reproduction. Consequently, they were found to have reduced *FI* compared to the

554 corresponding controls (JBs). In order to see whether our model was capable of recovering the

555 other features of the dynamics from the earlier experiment (Dey et al. 2008), we set a slightly

556 lower value of  $m_c$  for the FEJs and kept all other parameters the same as in the previous

557 simulations (Table 1). Our model was again able to capture the trends in the distributional  
558 properties (Figure 5A) and the *FI* values (Figure 5B) of JB and FEJ populations in both regimes.  
559 The data in Figure 2 and Figure 5 are from two completely independent experiments done at  
560 different times. The fact that our model is able to predict the major features of the latter data-set  
561 based on parameterizations done for a subset of the former shows that our parameterization was  
562 robust. However, we again emphasize here that the main focus of this study was to gather  
563 insights about how the various life-history and environmental parameters interact, and the  
564 excellent quantitative match between the data and the model is essentially a by-product.

565

### 566 **3.7 Simulations and experiments: no evidence for transients**

567 Due to logistic constraints, most population dynamics time series tend to be short. However, it is  
568 well known that the transient behavior of population dynamics models can be very different from  
569 the equilibrium behaviors (Hastings 2004; Hastings and Higgins 1994). In this study, to keep  
570 parity with our experiments, we had limited the length of each simulated time series to 49. To  
571 investigate if the long-term behavior of these time series was any different from the short-term  
572 behavior, we simulated the dynamics in each regime for 1000 generations, and computed all the  
573 quantities represented in Figure 2 for the last 49 generations (Figure S2). Comparing generations  
574 1-49 with generations 952-1000 revealed no major differences in either the population-size  
575 distributions or *FI*. This suggests that the transient dynamics in our model are almost  
576 indistinguishable from the longer-term dynamics.

577 Although their absence is re-assuring from a modeling perspective, transients are very much  
578 expected from a biological standpoint. This is because experimental evolution studies suggest

579 that in *Drosophila melanogaster*, even 10-15 generations is often sufficient for noticeable  
580 divergence in life-history related traits that can affect the dynamics (for examples see Prasad and  
581 Joshi 2003). Therefore, all else being equal, one would expect at least some of the stability  
582 determining parameters to evolve during the course of the experiment, which in turn is expected  
583 to lead to transient dynamics in a long time-series. Yet, we did not incorporate any evolution in  
584 our model, which meant that the various life-history parameters detailed in Table 1, remained  
585 constant in a particular simulation run. This was because it has been previously shown that at  
586 least over 45 generations, there are no observable changes in stability determining demographic  
587 parameters in laboratory populations of *D. melanogaster* (Mueller et al. 2000). Thus, we felt that  
588 it was safe to ignore changes in life-history parameters in the context of our empirical data and,  
589 therefore, did not incorporate their evolution in our model. However, we note that the structure  
590 of our model is such that it can be very easily extended to incorporate the evolution of stability-  
591 determining parameters and the effects of such evolutionary change on population dynamics.

592

#### 593 **4.0 CONCLUSION**

594 Mathematical modeling of the dynamics of laboratory populations has a long and venerable  
595 history (Kingsland 1995; Mueller and Joshi 2000) and has been successfully done for several  
596 model systems like *Tribolium* (Costantino et al. 1997), *Callosobruchus* (Tuda and Shimada  
597 2005), protists (Holyoak et al. 2000), mites (Benton and Beckerman 2005) etc. Depending on the  
598 objectives of their investigation, these studies have employed different kinds of modeling tools,  
599 ranging from simple deterministic difference equations, to coupled differential equations and  
600 individual-based models (reviewed in Mueller and Joshi 2000). Although one can draw some  
601 broad conclusions, it is somewhat difficult to make comparisons in terms of details of the

602 dynamics across studies on different model systems, and none were attempted here. The value of  
603 our study is first in the close correspondence between empirical observations and simulation  
604 results, and second in terms of the insights gained regarding the interaction of the environmental  
605 factors (larval and adult food level) with the life-history related traits to determine the population  
606 dynamics. *Drosophila* remains one of the few model systems in which experimental work on the  
607 interface of evolutionary and ecological dynamics has been carried out (Dey and Joshi 2013; Dey  
608 et al. 2008; Mueller et al. 2000; Prasad et al. 2003). Therefore, a model that can successfully  
609 capture most aspects of the population size distributions and dynamics of *Drosophila* laboratory  
610 populations under varied nutritional environments and selection histories is especially useful  
611 because of the possibility of developing the modeling framework to also incorporate evolution of  
612 the various life-history related traits under different kinds of population dynamics regimes.

613

#### 614 **ACKNOWLEDGEMENTS**

615 We thank N. G. Prasad, Mallikarjun Shakarad and M. Rajanna for help in the running of the  
616 experiments, and Neelesh Dahanukar for helpful discussion regarding data analysis. For financial  
617 support, ST thanks JNCASR, Bengaluru, for a Project Oriented Biological Education (POBE)  
618 fellowship and the Council for Scientific and Industrial Research, Government of India, for a  
619 Senior Research Fellowship. AJ thanks the Science and Engineering Research Board of the  
620 Department of Science and Technology, Government of India, for support through a J. C. Bose  
621 National Fellowship. This study was partly sponsored by an extra-mural grant from the Council  
622 of Scientific and Industrial Research, Government of India, and in-house funding from IISER-  
623 Pune and JNCASR, Bengaluru.



624

625 **REFERENCES**

- 626 Bakker, K. 1961. An analysis of factors which determine success in competition for food among  
627 larve of *Drosophila melanogaster*. Archives Neerlandaises de Zoologie 14:200-281.
- 628 Benton, T. G., and A. P. Beckerman. 2005. Population dynamics in a noisy world: lessons from a  
629 mite experimental system. Advances in Ecological Research 37:143-181.
- 630 Chiang, H. C., and A. C. Hodson. 1950. An analytical study of population growth in *Drosophila*  
631 *melanogaster*. Ecological Monographs 20:173-206.
- 632 Chippindale, A., A. M. Leroi, S. B. Kim, and M. R. Rose. 1993. Phenotypic plasticity and  
633 selection in *Drosophila* life-history evolution. 1. Nutrition and the cost of reproduction.  
634 Journal of Evolutionary Biology 6:171-193.
- 635 Costantino, R. F., R. A. Desharnais, J. M. Cushing, and B. Dennis. 1997. Chaotic dynamics in an  
636 insect population. Science 275:389-391.
- 637 Davidowitz, G., L. J. D'Amico, and H. F. Nijhout. 2003. Critical weight in the development of  
638 insect body size. Evolution and Development 5:188-197.
- 639 Dey, S. 2007. Experimental and theoretical investigation of the dynamics and stability of single  
640 populations and metapopulations of *Drosophila melanogaster* in the laboratory. Doctoral  
641 thesis, Jawaharlal Nehru Centre for Advanced Scientific Research, Bangalore.
- 642 Dey, S., and A. Joshi. 2006. Stability via asynchrony in *Drosophila* metapopulations with low  
643 migration rates. Science 312:434-436.
- 644 Dey, S., and A. Joshi. 2013. Effects of constant immigration on the dynamics and persistence of  
645 stable and unstable *Drosophila* populations. Scientific Reports 3:1405.
- 646 Dey, S., N. G. Prasad, M. Shakarad, and A. Joshi. 2008. Laboratory evolution of population  
647 stability in *Drosophila*: constancy and persistence do not necessarily coevolve. Journal of  
648 Animal Ecology 77:670-677.
- 649 Grimm, V., and C. Wissel. 1997. Babel, or the ecological stability discussions: an inventory and  
650 analysis of terminology and a guide for avoiding confusion. Oecologia 109:323-334.
- 651 Hastings, A. 2004. Transients: the key to long-term ecological understanding? Trends in Ecology  
652 & Evolution 19:39-45.
- 653 Hastings, A., and K. Higgins. 1994. Persistence of transients in spatially structured ecological  
654 models. Science 263:1133-1136.
- 655 Holyoak, M., S. Lawler, P., and P. H. Crowley. 2000. Predicting extinction: Progress with an  
656 individual-based model of protozoan predator and prey. Ecology 81:3312-3329.
- 657 Honěk, A. 1993. Intraspecific variation in body size and fecundity in insects: a general  
658 relationship. Oikos 66:483-492.
- 659 Kingsland, S. 1995, Modeling nature: episodes in the history of population ecology. Chicago,  
660 University of Chicago Press.
- 661 Marks, R. W. 1982. Genetic variability for density sensitivity of three components of fitness in  
662 *Drosophila melanogaster*. Genetics 101:301-316.
- 663 Miller, R. S., and J. L. Thomas. 1958. The effects of larval crowding and body size on the  
664 longevity of adult *Drosophila melanogaster*. Ecology 39:118-125.
- 665 Mueller, L. D. 1985. The evolutionary ecology of *Drosophila*. Evolutionary Biology 19:37-98.

- 666 —. 1988. Density-dependent population growth and natural selection in food limited  
667 environments: The *Drosophila* model. *American Naturalist* 132:786-809.
- 668 Mueller, L. D., and P. T. Huynh. 1994. Ecological determinants of stability in model  
669 populations. *Ecology* 75:430-437.
- 670 Mueller, L. D., and A. Joshi. 2000. *Stability in model populations*. Princeton, Princeton  
671 University Press.
- 672 Mueller, L. D., A. Joshi, and D. J. Borash. 2000. Does population stability evolve? *Ecology*  
673 81:1273-1285.
- 674 Pearl, R. 1932. The influence of density of population upon egg production in *Drosophila*  
675 *melanogaster*. *Journal of Experimental Zoology, Part A: Comparative Experimental*  
676 *Biology* 63:57-84.
- 677 Prasad, N. G., S. Dey, M. Shakarad, and A. Joshi. 2003. The evolution of population stability as  
678 a by-product of life-history evolution. *Proceedings of the Royal Society of London,*  
679 *Series B: Biological Sciences (Supplement: Biology Letters)* 270:S84-86.
- 680 Prasad, N. G., and A. Joshi. 2003. What have two decades of laboratory life-history evolution  
681 studies on *Drosophila melanogaster* taught us? *Journal of Genetics* 82:45-76.
- 682 Prasad, N. G., M. Shakarad, D. Anitha, M. Rajamani, and A. Joshi. 2001. Correlated responses to  
683 selection for faster development and early reproduction in *Drosophila melanogaster*: the  
684 evolution of larval traits. *Evolution* 55:1363-1372.
- 685 Prout, T., and F. McChesney. 1985. Competition among immatures affect their fertility:  
686 population dynamics. *American Naturalist* 126:521-558.
- 687 Rich, E. R. 1956. Egg cannibalism and fecundity in *Tribolium*. *Ecology* 37:109-120.
- 688 Robertson, F. W. 1963. The ecological genetics of growth in *Drosophila* 6. The genetic  
689 correlation between the duration of the larval period and body size in relation to larval  
690 diet. *Genetical Research* 4:74-92.
- 691 Sah, P., J. P. Salve, and S. Dey. 2013. Stabilizing biological populations and metapopulations by  
692 Adaptive Limiter Control *Journal of Theoretical Biology* 320:113-123.
- 693 Sheeba, V., and A. Joshi. 1998. A test of simple models of population growth using data from  
694 very small populations of *Drosophila melanogaster*. *Current science* 75:1406-1410.
- 695 Sheeba, V., A. Madhyastha, and A. Joshi. 1998. Oviposition preference for novel versus normal  
696 food resources in laboratory populations of *Drosophila melanogaster*. *Journal of*  
697 *Biosciences* 23:93-100.
- 698 Tuda, M., and M. Shimada. 2005. Complexity, evolution, and persistence in host-parasitoid  
699 experimental systems with *Callosobruchus* beetles as the host *Advances in Ecological*  
700 *Research* 37:37-75.
- 701 Tung, S. 2012. Insights into the mechanistic underpinnings for the evolution of population  
702 stability in *Drosophila*, based on modeling of laboratory populations, *Indian Institute of*  
703 *Science Education and Research- Kolkata, Kolkata*.
- 704 Tung, S., A. Mishra, and S. Dey. 2014. A comparison of six methods for stabilizing population  
705 dynamics. *Journal of Theoretical Biology* 356:163-173.
- 706 Vijendravarma, R. K., S. Narasimha, and T. J. Kawecki. 2013. Predatory cannibalism in  
707 *Drosophila melanogaster* larvae. *Nature Communications* 4:1789.
- 708 Zar, J. H. 1999, *Biostatistical Analysis*. New Jersey, Prentice Hall.

709  
710  
711  
712  
713  
714  
715  
716  
717

## Supplementary online material

for

### Understanding the dynamics of laboratory populations of *Drosophila melanogaster*: Long-term experiments meet individual-based modelling

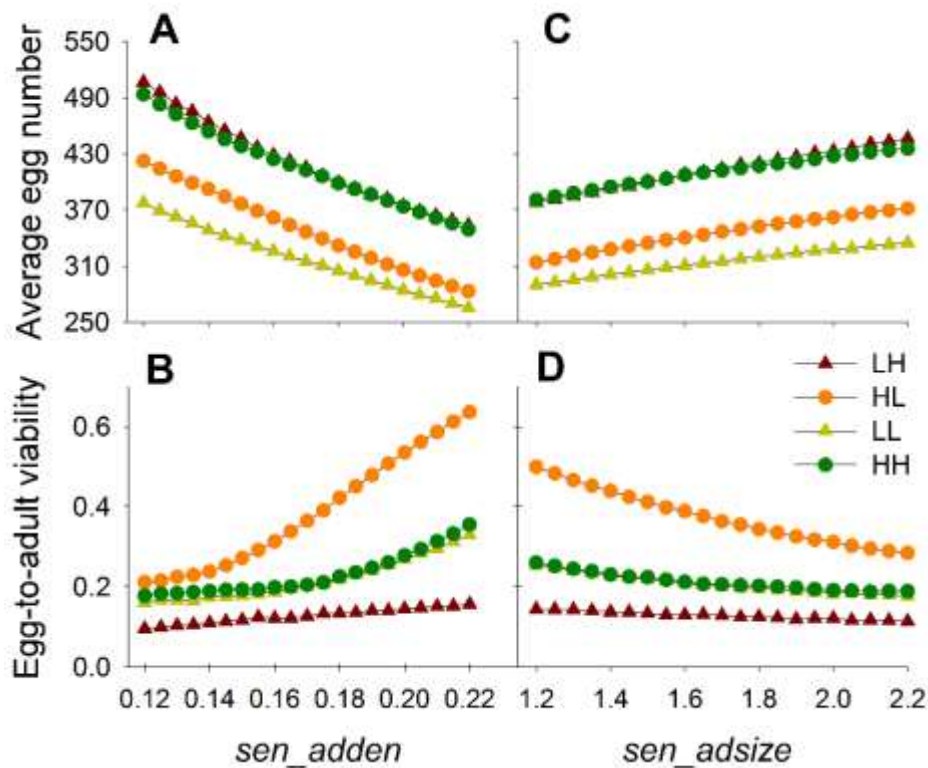

**Figure S1. Effect of varying *sen\_adden* and *sen\_adsize* on the average egg number and egg-to-adult viability.** Each point represents average ( $\pm$  SEM) fluctuation index of 100 replicates of 100-gen long simulated time series. Error bars are too small to be visible. Effects of sensitivity to adult density (*sen\_adden*) on **A**. Average egg number and **B**. Egg-to-adult viability. Effects of sensitivity to adult size (*sen\_adsize*) on **C**. Average egg number and **D**. Egg-to-adult viability. Note that, in C and D, LH is the least affected by increases in the parameter values. See text for explanation.

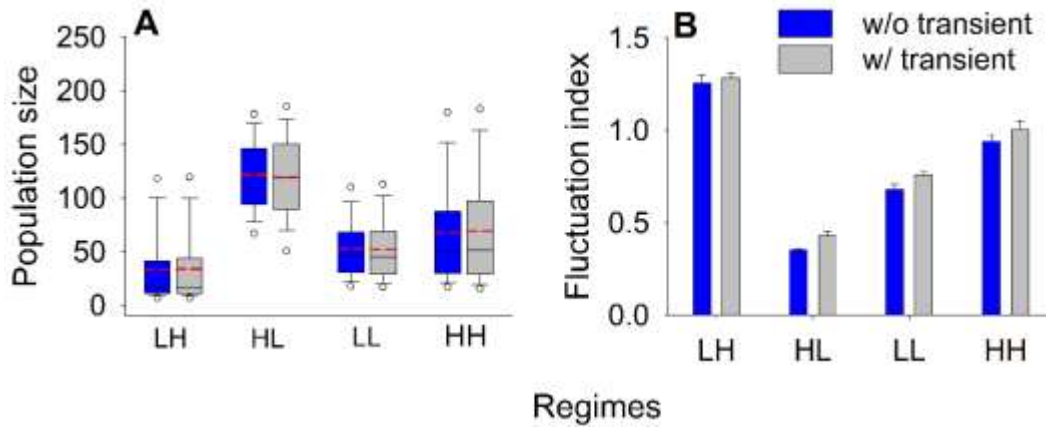

**Figure S2. Population size distribution and constancy stability of short and long term dynamics.** Blue boxes and bars represent the data for long term dynamics (generation 951-1000), where transients are excluded, whereas the grey shaded boxes and bars represents short term dynamics (generation 1-49). **(A)** Descriptive statistics of the population size distributions for long and short term dynamics in four regimes. Red dashed lines = means, thin black lines = medians, edges of the boxes=25<sup>th</sup> and 75<sup>th</sup> percentiles, whiskers=10<sup>th</sup> and 90<sup>th</sup> percentiles and the circles outside = 5<sup>th</sup> and 95<sup>th</sup> percentiles of the distributions. **(B)** Average ( $\pm$  SEM) *FI* of the population size distributions for long and short term dynamics in four regimes. In both panels, there are no systematic differences between the short- and long-term dynamics.

718
